# Supplementary material
Source: HighWire-hosted journal article supplement (https://jnm.snmjournals.org/highwire/filestream/94370/field_highwire_adjunct_files/0/101626_Supplemental_Data.pdf)
Supplement: 101626_Supplemental_Data.pdf [file 101626_Supplemental_Data.pdf]

Supplemental TABLE 1. Kinetic parameters by the 2-TCM using the summation of parent and M1 as the input function.

|                       | $K_1$ (mL · cm <sup>-3</sup> · min <sup>-1</sup> ) | $k_2$ (min <sup>-1</sup> ) | $k_3$ (min <sup>-1</sup> ) | $k_4$ (min <sup>-1</sup> ) | $K_1/k_2$ (mL · cm <sup>-3</sup> ) | $k_3/k_4$            | $V_T$ (mL · cm <sup>-3</sup> ) | AIC      |
|-----------------------|----------------------------------------------------|----------------------------|----------------------------|----------------------------|------------------------------------|----------------------|--------------------------------|----------|
| Putamen               | 0.290 ± 0.053<br>(1.3)                             | 0.065 ± 0.013<br>(7.8)     | 0.049 ± 0.017<br>(18)      | 0.033 ± 0.009<br>(12)      | 4.57 ± 1.00<br>(6.7)               | 1.50 ± 0.33<br>(9.9) | 11.2 ± 2.05<br>(2.6)           | -45 ± 23 |
| Caudate               | 0.249 ± 0.047<br>(1.4)                             | 0.051 ± 0.010<br>(9.4)     | 0.036 ± 0.014<br>(30)      | 0.033 ± 0.011<br>(23)      | 5.05 ± 1.16<br>(8.2)               | 1.10 ± 0.26<br>(15)  | 10.6 ± 2.55<br>(4.5)           | -35 ± 17 |
| Midbrain              | 0.204 ± 0.042<br>(2.3)                             | 0.099 ± 0.018<br>(9.1)     | 0.024 ± 0.012<br>(45)      | 0.039 ± 0.012<br>(37)      | 2.09 ± 0.36<br>(7.3)               | 0.62 ± 0.21<br>(19)  | 3.4 ± 0.6<br>(4.3)             | 19 ± 22  |
| Thalamus <sup>a</sup> | 0.272 ± 0.035<br>(2.0)                             | 0.158 ± 0.076<br>(11)      | 0.124 ± 0.292<br>(52)      | 0.117 ± 0.192<br>(38)      | 1.94 ± 0.61<br>(9.7)               | 0.45 ± 0.44<br>(27)  | 2.6 ± 0.5<br>(2.8)             | 0.4 ± 21 |

Values are mean ± SD (N = 10)

SE (%), which is inversely related to identifiability of parameters, is shown in parentheses below the variable itself.

AIC: Akaike Information Criterion

<sup>a</sup>Data from seven subjects. The data of the cerebellum is not shown because the convergence was not achieved in most of the subjects.

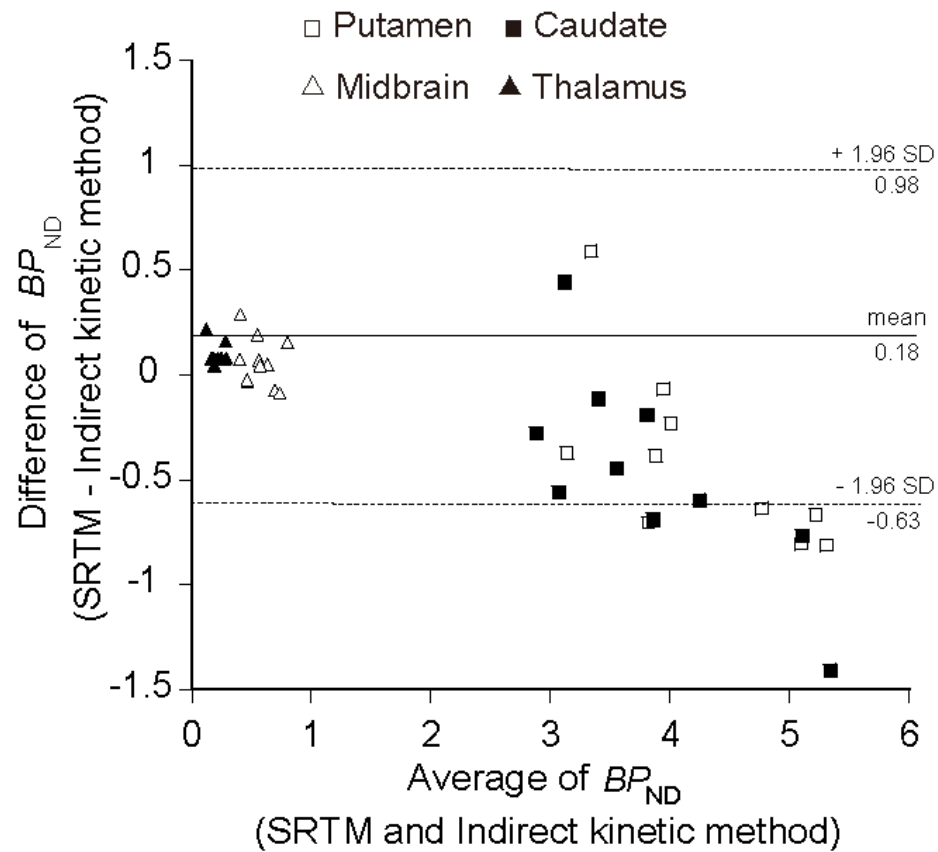

Supplemental Figure 1. Bland-Altman plot of  $BP_{ND}$  by simplified reference tissue model method and indirect kinetic method.
